# Supplementary material
Source: PubMed Central journal article supplement (PMC1463134)
Supplement: bjpg55-305TableS1.pdf [file bjpg55-305TableS1.pdf]

**Supplementary Table 1. Studies with objective outcome measures, the assessment of clinical relevance and statistical significant effect and demonstration of statistical data.**

| Reference | Objective outcome measure                                                                                                                     | Is the effect of the outcome measure evaluated as clinically relevant | Does the article conclude the effect is statistically significant, 95% CI | Does the article show sufficient statistical data (mean, SD, SE) <sup>a</sup> |
|-----------|-----------------------------------------------------------------------------------------------------------------------------------------------|-----------------------------------------------------------------------|---------------------------------------------------------------------------|-------------------------------------------------------------------------------|
| 5         | HbA <sub>1c</sub> : interventions group fall = 11.75 to 11.02 %GHb; control group fall = 10.82 to 10.78 %GHb                                  | Yes                                                                   | Yes                                                                       | Yes                                                                           |
| 6         | B-gamma GT mean fall from 190–30mM                                                                                                            | Yes                                                                   | Yes                                                                       | No                                                                            |
| 8         | HIV +/- (does behaviour determine status as HIV+ or HIV-)                                                                                     | Yes                                                                   | Yes                                                                       | No                                                                            |
| 9         | HIV +/- (does behaviour determine status as HIV+ or HIV-)                                                                                     | Yes                                                                   | No                                                                        | No                                                                            |
| 10        | Peak BAC (blood alcohol concentration) mean fall from 140 to 90 mg%                                                                           | Yes                                                                   | Yes                                                                       | Yes                                                                           |
| 11        | Nicotine test <10 ng/ml (smoking or not)                                                                                                      | Yes                                                                   | Yes                                                                       | Yes                                                                           |
| 12        | Blood cholesterol fall = 3.5mg/dL                                                                                                             | Yes                                                                   | Yes                                                                       | No                                                                            |
| 13        | Blood alcohol fall = 168 to 149 mg/dL                                                                                                         | Yes                                                                   | Yes                                                                       | No                                                                            |
| 14        | Blood cholesterol fall = 9.5 to 8.6 mg/dL, diet-cholesterol fall = 183 to 157 mg/1000kcal                                                     | Yes                                                                   | Yes                                                                       | Yes                                                                           |
| 15        | Length of stay, 47 to 21 fall in hospitalised days for psychiatric patients                                                                   | Yes                                                                   | Yes                                                                       | No                                                                            |
| 16        | Moderate physical activity = using a minimum of 5–7.5kcal/min., body mass index (BMI) fall                                                    | Yes                                                                   | Yes                                                                       | No                                                                            |
| 17        | Urine cocaine test +/- (drug addiction or not)                                                                                                | Yes                                                                   | Yes                                                                       | No                                                                            |
| 19        | Urine cocaine test +/- (drug addiction or not)                                                                                                | Yes                                                                   | No                                                                        | Yes                                                                           |
| 21        | Number of encounters sustained with the patient as a measure of adherence                                                                     | Yes                                                                   | Yes                                                                       | No                                                                            |
| 22        | Nicotine test <10 ng/ml (smoking or not)                                                                                                      | Yes                                                                   | Yes                                                                       | No                                                                            |
| 24        | Urine cocaine test +/- (drug addiction or not)                                                                                                | Yes                                                                   | Yes                                                                       | Yes                                                                           |
| 26        | Number of encounters sustained with the patient as a measure of adherence                                                                     | Yes                                                                   | No                                                                        | No                                                                            |
| 27        | Fall = BMI = 27 to 26, total cholesterol = 7 to 6, Energy intake = 1900 to 1650 kcal/day, fat intake = 70 to 17 g/day                         | Yes                                                                   | Yes                                                                       | Yes                                                                           |
| 29        | HbA <sub>1c</sub> fall = 10.8 to 9.8 %GHb, weight loss 6 kg, BMI fall = 34.7 to <30                                                           | Yes                                                                   | Yes                                                                       | Yes                                                                           |
| 30        | Systolic BT = 140-134, diastolic BT = 80-75, weight loss = 2 kg, alcohol intake fall = 170g/day                                               | Yes                                                                   | Yes                                                                       | Yes                                                                           |
| 33        | BAC (mg%), Standard ethanol content (SEC) (units)                                                                                             | Yes                                                                   | Yes                                                                       | Yes                                                                           |
| 34        | BAC (mg%), SEC (units)                                                                                                                        | Yes                                                                   | Yes                                                                       | Yes                                                                           |
| 35        | BMI = -0.5, weight = -0.5 kg, systolic/diastolic blood pressure fall = 3 units (mmHg) per blood pressure, HbA <sub>1c</sub> = 9.8 to 8.8 %GHb | Yes                                                                   | No                                                                        | Yes                                                                           |
| 37        | Weight loss = -2.5 kg, total cholesterol fall = 0.1 mM (3.8 mg/dL), LDL fall = 0.1mM, FFA fall = 0.15mM, BMI fall = 1.5                       | Yes                                                                   | Yes                                                                       | Yes                                                                           |
| 38        | Number of admissions for drug addicts                                                                                                         | Yes                                                                   | Yes                                                                       | No                                                                            |
| 39        | SEC (units)                                                                                                                                   | Yes                                                                   | Yes                                                                       | Yes                                                                           |
| 40        | SEC fall = 23 to 12 units, Peak BAC fall = 75 to 56 mg%                                                                                       | Yes                                                                   | Yes                                                                       | Yes                                                                           |
| 43        | Metadon dosis in mg                                                                                                                           | Yes                                                                   | Yes                                                                       | No                                                                            |
| 44        | Number of admissions for drug addicts                                                                                                         | Yes                                                                   | Yes                                                                       | No                                                                            |
| 45        | Number of admissions for drug addicts                                                                                                         | Yes                                                                   | Yes                                                                       | No                                                                            |
| 46        | Weight loss, BMI                                                                                                                              | No                                                                    | No                                                                        | Yes                                                                           |
| 49        | Peak BAC (mg%) fall                                                                                                                           | Yes                                                                   | Yes                                                                       | No                                                                            |
| 51        | SEC (units)                                                                                                                                   | Yes                                                                   | Yes                                                                       | Yes                                                                           |
| 52        | Cost-benefit analysis, admissions, referrals, out-patients                                                                                    | Yes                                                                   | Yes                                                                       | No                                                                            |
| 60        | HbA <sub>1c</sub> fall = 7.4 to 6.9 %GHb, BMI fall = 0.5                                                                                      | Yes                                                                   | Yes                                                                       | Yes                                                                           |
| 65        | Compliance towards taking HIV medication                                                                                                      | Yes                                                                   | No                                                                        | No                                                                            |
| 66        | Drinks per drinking day                                                                                                                       | Yes                                                                   | No                                                                        | No                                                                            |
| 67        | Carbon monoxide test                                                                                                                          | Yes                                                                   | Yes                                                                       | No                                                                            |
| 72        | BAC (mg%)                                                                                                                                     | Yes                                                                   | Yes                                                                       | No                                                                            |
| 73        | BAC (mg%)                                                                                                                                     | No                                                                    | No                                                                        | No                                                                            |
| 76        | BAC (mg%), SEC (units)                                                                                                                        | Yes                                                                   | Yes                                                                       | Yes                                                                           |
| 77        | Length of hospital stay, treatment participation                                                                                              | Yes                                                                   | No                                                                        | No                                                                            |

<sup>a</sup>Statistical data is shown in Table 6 and has been used in the meta-analysis. CI = confidence interval. SD = standard deviation. SE = standard error.
