# Supplementary material
Source: PubMed Central journal article supplement (PMC1463134)
Supplement: bjpg55-305TableS2.pdf [file bjpg55-305TableS2.pdf]

Supplementary Table 2. Meta-analysis, the effect of motivational interviewing.

| Effect Measure/Reference number         | <i>n</i> | $\Delta$ effect estimate | <i>P</i> -value (95% CI) |
|-----------------------------------------|----------|--------------------------|--------------------------|
| BMI/27                                  | 97       | 0.60                     | 0.250 (-0.42 to 1.62)    |
| BMI/29                                  | 16       | 4.70                     | 0.063 (-0.26 to 9.66)    |
| BMI/35                                  | 147      | 0.48                     | 0.624 (-1.43 to 2.38)    |
| BMI/37                                  | 550      | 0.80                     | 0.001 (0.32 to 1.28)     |
| BMI/46                                  | 296      | 0.30                     | 0.602 (-0.83 to 1.43)    |
| BMI/60                                  | 34       | 0.46                     | 0.836 (-3.90 to 4.82)    |
| Combined BMI effect                     | 1140     | 0.72 <sup>a</sup>        | 0.0001 (0.33 to 1.11)    |
| HbA <sub>1c</sub> /5                    | 46       | 0.69                     | 0.394 (-0.90 to 2.28)    |
| HbA <sub>1c</sub> /29                   | 16       | 1.00                     | 0/370 (-1.19 to 3.19)    |
| HbA <sub>1c</sub> /35                   | 147      | 0.46                     | 0.300 (-0.41 to 1.33)    |
| HbA <sub>1c</sub> /60                   | 34       | 0.15                     | 0.771 (-0.86 to 1.16)    |
| Combined HbA <sub>1c</sub> effect       | 243      | 0.43                     | 0.155 (-0.16 to 1.01)    |
| Total blood Cholesterol/14              | 334      | 0.90                     | 0.000 (0.74 to 1.06)     |
| Total blood Cholesterol/37              | 927      | 0.12                     | 0.005 (0.04 to 0.20)     |
| Total blood Cholesterol/27              | 97       | 0.02                     | 0.885 (-0.25 to 0.29)    |
| Combined Total blood Cholesterol effect | 1358     | 0.27 <sup>a</sup>        | 0.0001 (0.20 to 0.34)    |
| Cigarettes per day/11                   | 40       | 1.10                     | 0.737 (-5.32 to 7.52)    |
| Cigarettes per day/19                   | 29       | 1.90                     | 0.056 (-0.05 to 3.85)    |
| Cigarettes per day/24                   | 121      | 0.10                     | 0.946 (-2.77 to 2.97)    |
| Combined cigarettes per day effect      | 190      | 1.32                     | 0.099 (-0.25 to 2.88)    |
| Systolic blood pressure/30              | 166      | 4.00                     | 0.117 (-1.00 to 9.00)    |
| Systolic blood pressure/35              | 150      | 4.59                     | 0.172 (-1.99 to 11.18)   |
| Combined systolic blood pressure effect | 316      | 4.22 <sup>a</sup>        | 0.038 (0.23 to 8.99)     |
| BAC/10                                  | 34       | 76.00                    | 0.001 (32.95 to 119.10)  |
| BAC/33                                  | 32       | 41.00                    | 0.384 (-51.34 to 133.30) |
| BAC/34                                  | 28       | 98.80                    | 0.006 (28.24 to 169.40)  |
| BAC/76                                  | 42       | 48.00                    | 0.096 (-8.56 to 104.60)  |
| BAC/30                                  | 100      | 164.00                   | 0.004 (53.50 to 274.50)  |
| BAC/40                                  | 42       | 59.90                    | 0.086 (-8.46 to 128.30)  |
| Combined BAC effect                     | 278      | 72.92 <sup>a</sup>       | 0.0001 (46.80 to 99.04)  |
| SEC/34                                  | 28       | 52.30                    | 0.001 (22.38 to 82.22)   |
| SEC/34                                  | 32       | 280.50                   | 0.346 (-302.6 to 863.60) |
| SEC/10                                  | 32       | 20.10                    | 0.052 (-0.19 to 40.40)   |
| SEC/39                                  | 409      | 15.10                    | 0.000 (14.17 to 16.04)   |
| SEC/76                                  | 42       | 12.00                    | 0.120 (-3.12 to 27.12)   |
| SEC/51                                  | 63       | 3.39                     | 0.132 (-1.03 to 7.81)    |
| SEC/40                                  | 42       | 16.60                    | 0.098 (-3.04 to 36.24)   |
| Combined SEC effect                     | 648      | 14.64 <sup>a</sup>       | 0.0001 (13.73 to 15.55)  |

<sup>a</sup>Combined estimate is statistical significant within 95% CI. All D effect estimates are positive. Sum weight/sum est\*weight are values from the meta-analysis, where the effect estimates are weighed against number of participants in each study. BMI = body mass index. HbA<sub>1c</sub> (% GHb). BAC = blood alcohol concentration (mg%) blood total cholesterol (mmol/l). CI = confidence interval. SEC = standard ethanol content (standard units). Systolic blood pressure (mmHg).
